# Supplementary material for: WNT signaling inducing activity in ascites predicts poor outcome in ovarian cancer
Source: PubMed Central journal article supplement (PMC6929979; doi:10.7150/thno.37423), 2020-01-01
Supplement: thnov10p0537s1.pdf [file thnov10p0537s1.pdf]

## **SUPPLEMENTARY FIGURE LEGENDS**

### **Supplementary Figure S1: Differential potential to induce WNT signaling separates two groups of ascites/patients.**

Quantification of WB results from Fig. 1B, 1D and 2B. Activity of WNT signaling is expressed as the ratio of PS-DVL to total levels of DVL protein. **A)** DVL2, WNT CM. **A')** DVL2, rhWNT. **B)** DVL3, WNT CM. **B')** DVL3, rhWNT. **C-D)** Patients in group A (grey) have an increased ratio ( $P$  value  $< 0.05$ ) of PS-DVL/total DVL in comparison to control (LGK974 treated cells, open bar). Group B patients are shown in orange. Data is presented as mean  $\pm$  SD. \* =  $P \leq 0.05$ ; \*\* =  $P \leq 0.01$ ; \*\*\* =  $P \leq 0.001$ . \*\*\*\* =  $P < 0.0001$ , n.s. = non-significant ( $P > 0.05$ ). Tukey post-hoc test of one-way ANOVA was used in A-B, paired t-test was used in C-D.

### **Supplementary Figure S2: Quantification of WB results from Fig. 2B, 2D and 3B.**

**A)** pLRP6, WNT CM. **A')** pLRP6, rhWNT. **B)** ROR1, WNT CM. **B')** ROR1, rhWNT. **C)** ROR2, WNT CM. **C')** ROR2, rhWNT. **D)** pLRP6, ascites. **E)** ROR1, ascites. **F)** ROR2, ascites. **G)** DVL2, WNT5a CM. CKI inhibitor. **H)** DVL3, WNT5a CM. CKI inhibitor. Data is presented as mean  $\pm$  SD. \* =  $P \leq 0.05$ ; \*\* =  $P \leq 0.01$ ; \*\*\* =  $P \leq 0.001$ . \*\*\*\* =  $P < 0.0001$ , n.s. = non-significant ( $P > 0.05$ ). Tukey post-hoc test of one-way ANOVA was used in A-C, G-H, paired t-test was used in D-F.

### **Supplementary Figure S3: Functional assays with WNTs.**

Kuramochi cells were treated and assays performed exactly as in experiments in Fig. 2 but WNT ligands were provided in the form of recombinant human (rh) proteins. **A)** TOPFLASH assay. **B)** Sphere assay. **C)** Sphere assay in which WNTs and LGK974 were added during the assay to cells pretreated with LGK974. **D)** Migration assay. **E)** Invasion assay. **F-G)** Migration in xCELLigence system, cells were treated with WNT CM (**F**) or rhWNT (**G**). Two time points (4 h and 16 h) are plotted on the right. Data is presented as mean  $\pm$  SD. \* =  $P \leq 0.05$ ; \*\* =  $P \leq 0.01$ ; \*\*\* =  $P \leq 0.001$ . \*\*\*\* =  $P < 0.0001$  (Tukey post-hoc test of one-way ANOVA), n.s. = non-significant ( $P > 0.05$ ).

### **Supplementary Figure S4: Evaluation of DVL3 KO Kuramochi cells.**

**A)** PCR strategy used to select DVL3 KO clones. The amplified fragment was digested with *Hpa*II restriction endonuclease. The *Hpa*II site was disrupted in the mutant allele, which shows only one larger band (349 bp) as opposed to the WT allele which yielded two small bands (185 bp and 164 bp). DVL3 KO cells harbor the same basal migration potential (**B**) and proliferate similarly in basal conditions (**C**) as WT cells. There was also no significant difference in the proliferation rate upon stimulation with WNT CM between WT cells (**D**) and DVL3 KO clones A7 (**D'**) and C2 (**D''**). n.s. = non-significant ( $P > 0.05$ ) in Tukey post-hoc test of one-way ANOVA.

### **Supplementary Figure S5: Quantification of WNT5A protein levels in all ascites.**

**A)** The raw data of all ascitic samples were processed simultaneously (as described in Fig. 4C) to allow reliable quantification. X – patients excluded from the study. **B)** Quantification of data from A. 0.15 was set as a cut-off value for segregation into WNT5A high and WNT5A low/negative groups for analysis of patient outcome.

**Supplementary Figure S6: Core WNT/PCP components are differentially expressed in HGSC.**

The OncoPrint™ Platform (Thermo Fisher, Ann Arbor, MI) was used for analysis and visualization. **A)** WNT/PCP genes are overexpressed in OC in comparison to other cancers. A meta-analysis of 15 datasets/studies was performed. It harbors all datasets available containing ovarian cancer data and includes both multi-cancer studies using primary samples (4 in total) as well as 11 studies on cell lines. The respective published studies are indicated in the reference list [1-10]. Genes above the dashed line are significantly overexpressed in OC across the studies ( $P$  value  $< 0.05$ ). **B)** WNT/PCP genes are differentially expressed in HGSC in comparison to healthy ovaries. A meta-analysis of datasets/studies was performed. It consists of all datasets available that specifically contain HGSC and healthy ovarian tissue data. The respective studies are indicated in the reference list [11-15]. Genes above the dashed line are significantly overexpressed (red color, left panel) or underexpressed (blue color, right panel) in HGSC over normal ovarian tissue across the studies ( $P$  value  $< 0.05$ ). **C)** WNT/PCP genes are differentially expressed in metastasis in comparison with primary tumor. A meta-analysis of all four available studies was performed. The respective studies are indicated in the reference list [11, 16]. Genes above the dashed line are significantly overexpressed (red color, left panel) or underexpressed (blue color, right panel) in secondary over primary tumors across the studies ( $P$  value  $< 0.05$ ). **D)** Datasets used in OncoPrint analysis. Complete information about datasets is available in Supplementary Table ST4.

**Supplementary Figure S7: Quantification of WBs from Fig. 4B and 4C.**

Violin plot. \* =  $P \leq 0.05$ ; \*\* =  $P \leq 0.01$ ; \*\*\* =  $P \leq 0.001$  (unpaired t-test).

## **SUPPLEMENTARY TABLE LEGENDS**

### **Supplementary Table ST1: Clinicopathological data of patient cohorts.**

Data from a cohort of 33 patients. From April 2013 to July 2018, patients undergoing surgical treatment for OC who were suitable for ascites collection at the Department of Obstetrics and Gynecology, University Hospital Brno were consecutively enrolled into the study.

### **Supplementary Table ST2: The core WNT/PCP genes are very rarely mutated in HGSC.**

Mutational status of the WNT/PCP genes was examined using the COSMIC database. The frequency of mutations in HGSC resulting in change in amino acids sequence was calculated for each gene. Asterisks indicate genes, which were found to be mutated in study by Choi [17]; \* indicates patient OSC3, where mutations were found in nine multiregional biopsies of metastatic HGSC, \*\* indicates patient OSC2, where mutations were found in seven multiregional biopsies of metastatic HGSC. Genes are ordered according to their location within the WNT/PCP pathway and alphabetically within each group which is indicated in the first column.

### **Supplementary Table ST3: Univariate and multivariate Cox proportional hazard models of overall survival of patients with HGSC in TCGA cohort.**

Detailed analysis of individual gene probes retrieved from Oncomine database (TCGA Ovarian dataset). HR with 95% confidence interval represents ratios for OS of patients in the group above the cut-off compared to OS in below the cut-off group. *P* value in bold indicates statistical significance (*P* value < 0.05).

### **Supplementary Table ST4: Dataset references for Supplementary Fig. S6.**

**REFERENCES FOR SUPPLEMENTARY FIGURES AND TABLES**

1. Barretina J, Caponigro G, Stransky N, Venkatesan K, Margolin AA, Kim S, et al. The Cancer Cell Line Encyclopedia enables predictive modelling of anticancer drug sensitivity. *Nature*. 2012; 483: 603-7.
2. Garnett MJ, Edelman EJ, Heidorn SJ, Greenman CD, Dastur A, Lau KW, et al. Systematic identification of genomic markers of drug sensitivity in cancer cells. *Nature*. 2012; 483: 570-5.
3. Gyorffy B, Surowiak P, Kiesslich O, Denkert C, Schafer R, Dietel M, et al. Gene expression profiling of 30 cancer cell lines predicts resistance towards 11 anticancer drugs at clinically achieved concentrations. *Int J Cancer*. 2006; 118: 1699-712.
4. Lee JK, Havaleshko DM, Cho H, Weinstein JN, Kaldjian EP, Karpovich J, et al. A strategy for predicting the chemosensitivity of human cancers and its application to drug discovery. *Proc Natl Acad Sci U S A*. 2007; 104: 13086-91.
5. Ramaswamy S, Tamayo P, Rifkin R, Mukherjee S, Yeang CH, Angelo M, et al. Multiclass cancer diagnosis using tumor gene expression signatures. *Proc Natl Acad Sci U S A*. 2001; 98: 15149-54.
6. Ramaswamy S, Ross KN, Lander ES, Golub TR. A molecular signature of metastasis in primary solid tumors. *Nat Genet*. 2003; 33: 49-54.
7. Scherf U, Ross DT, Waltham M, Smith LH, Lee JK, Tanabe L, et al. A gene expression database for the molecular pharmacology of cancer. *Nat Genet*. 2000; 24: 236-44.
8. Shankavaram UT, Reinhold WC, Nishizuka S, Major S, Morita D, Chary KK, et al. Transcript and protein expression profiles of the NCI-60 cancer cell panel: an integromic microarray study. *Mol Cancer Ther*. 2007; 6: 820-32.
9. Staunton JE, Slonim DK, Collier HA, Tamayo P, Angelo MJ, Park J, et al. Chemosensitivity prediction by transcriptional profiling. *Proc Natl Acad Sci U S A*. 2001; 98: 10787-92.
10. Su AI, Welsh JB, Sapinoso LM, Kern SG, Dimitrov P, Lapp H, et al. Molecular classification of human carcinomas by use of gene expression signatures. *Cancer Res*. 2001; 61: 7388-93.
11. Adib TR, Henderson S, Perrett C, Hewitt D, Bourmpoulia D, Ledermann J, et al. Predicting biomarkers for ovarian cancer using gene-expression microarrays. *Br J Cancer*. 2004; 90: 686-92.
12. Bonome T, Levine DA, Shih J, Randonovich M, Pise-Masison CA, Bogomolny F, et al. A gene signature predicting for survival in suboptimally debulked patients with ovarian cancer. *Cancer Res*. 2008; 68: 5478-86.
13. Hendrix ND, Wu R, Kuick R, Schwartz DR, Fearon ER, Cho KR. Fibroblast growth factor 9 has oncogenic activity and is a downstream target of Wnt signaling in ovarian endometrioid adenocarcinomas. *Cancer Res*. 2006; 66: 1354-62.
14. Lu KH, Patterson AP, Wang L, Marquez RT, Atkinson EN, Baggerly KA, et al. Selection of potential markers for epithelial ovarian cancer with gene expression arrays and recursive descent partition analysis. *Clin Cancer Res*. 2004; 10: 3291-300.
15. Cancer Genome Atlas Research N. Integrated genomic analyses of ovarian carcinoma. *Nature*. 2011; 474: 609-15.
16. Anglesio MS, Arnold JM, George J, Tinker AV, Tothill R, Waddell N, et al. Mutation of ERBB2 provides a novel alternative mechanism for the ubiquitous activation of RAS-MAPK in ovarian serous low malignant potential tumors. *Mol Cancer Res*. 2008; 6: 1678-90.
17. Choi YJ, Rhee JK, Hur SY, Kim MS, Lee SH, Chung YJ, et al. Intraindividual genomic heterogeneity of high-grade serous carcinoma of the ovary and clinical utility of ascitic cancer cells for mutation profiling. *J Pathol*. 2017; 241: 57-66.



# Supplementary Figure S2

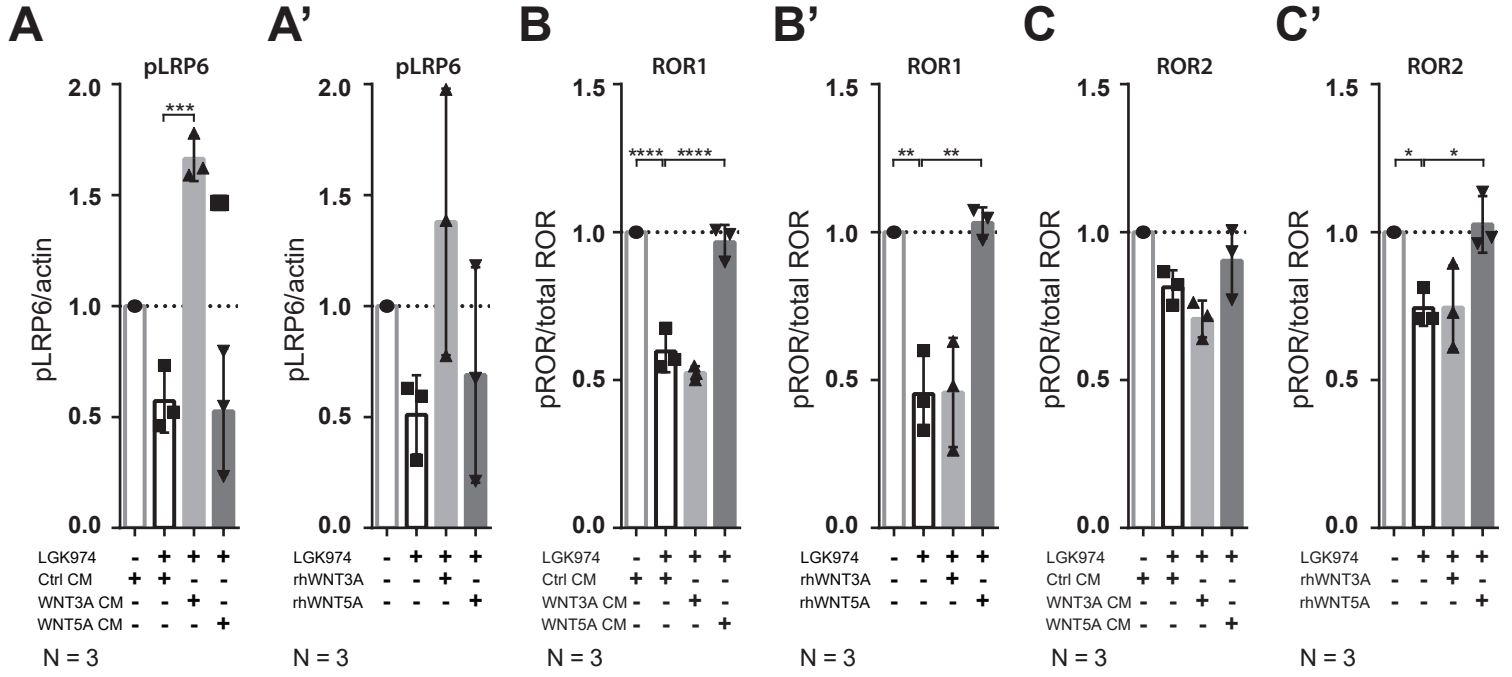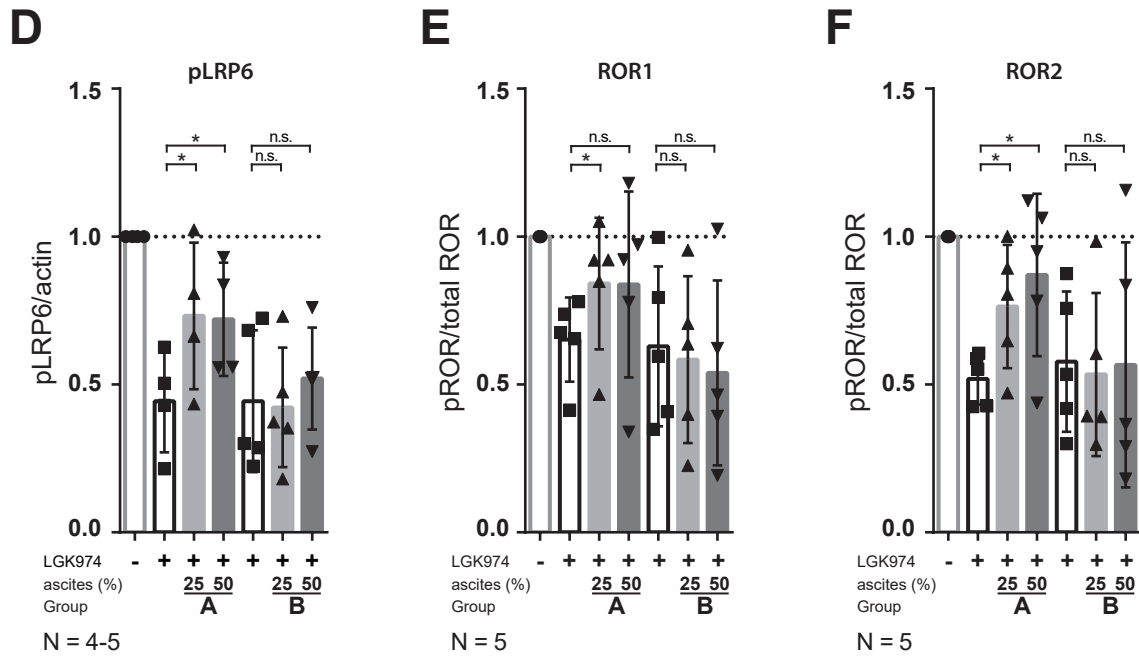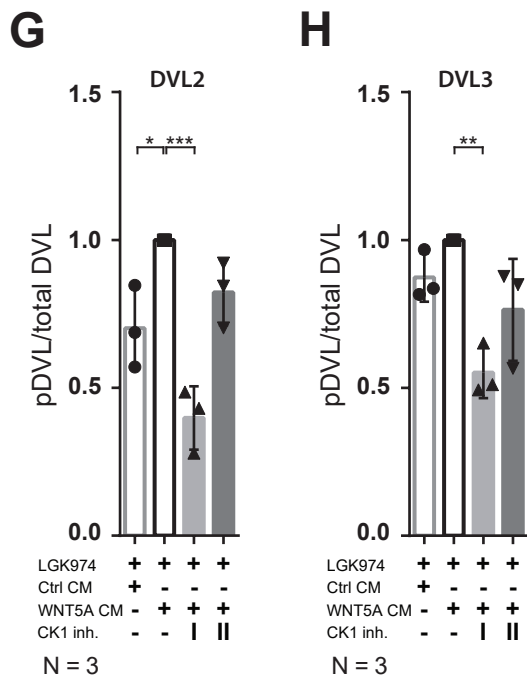

# Supplementary Figure S3

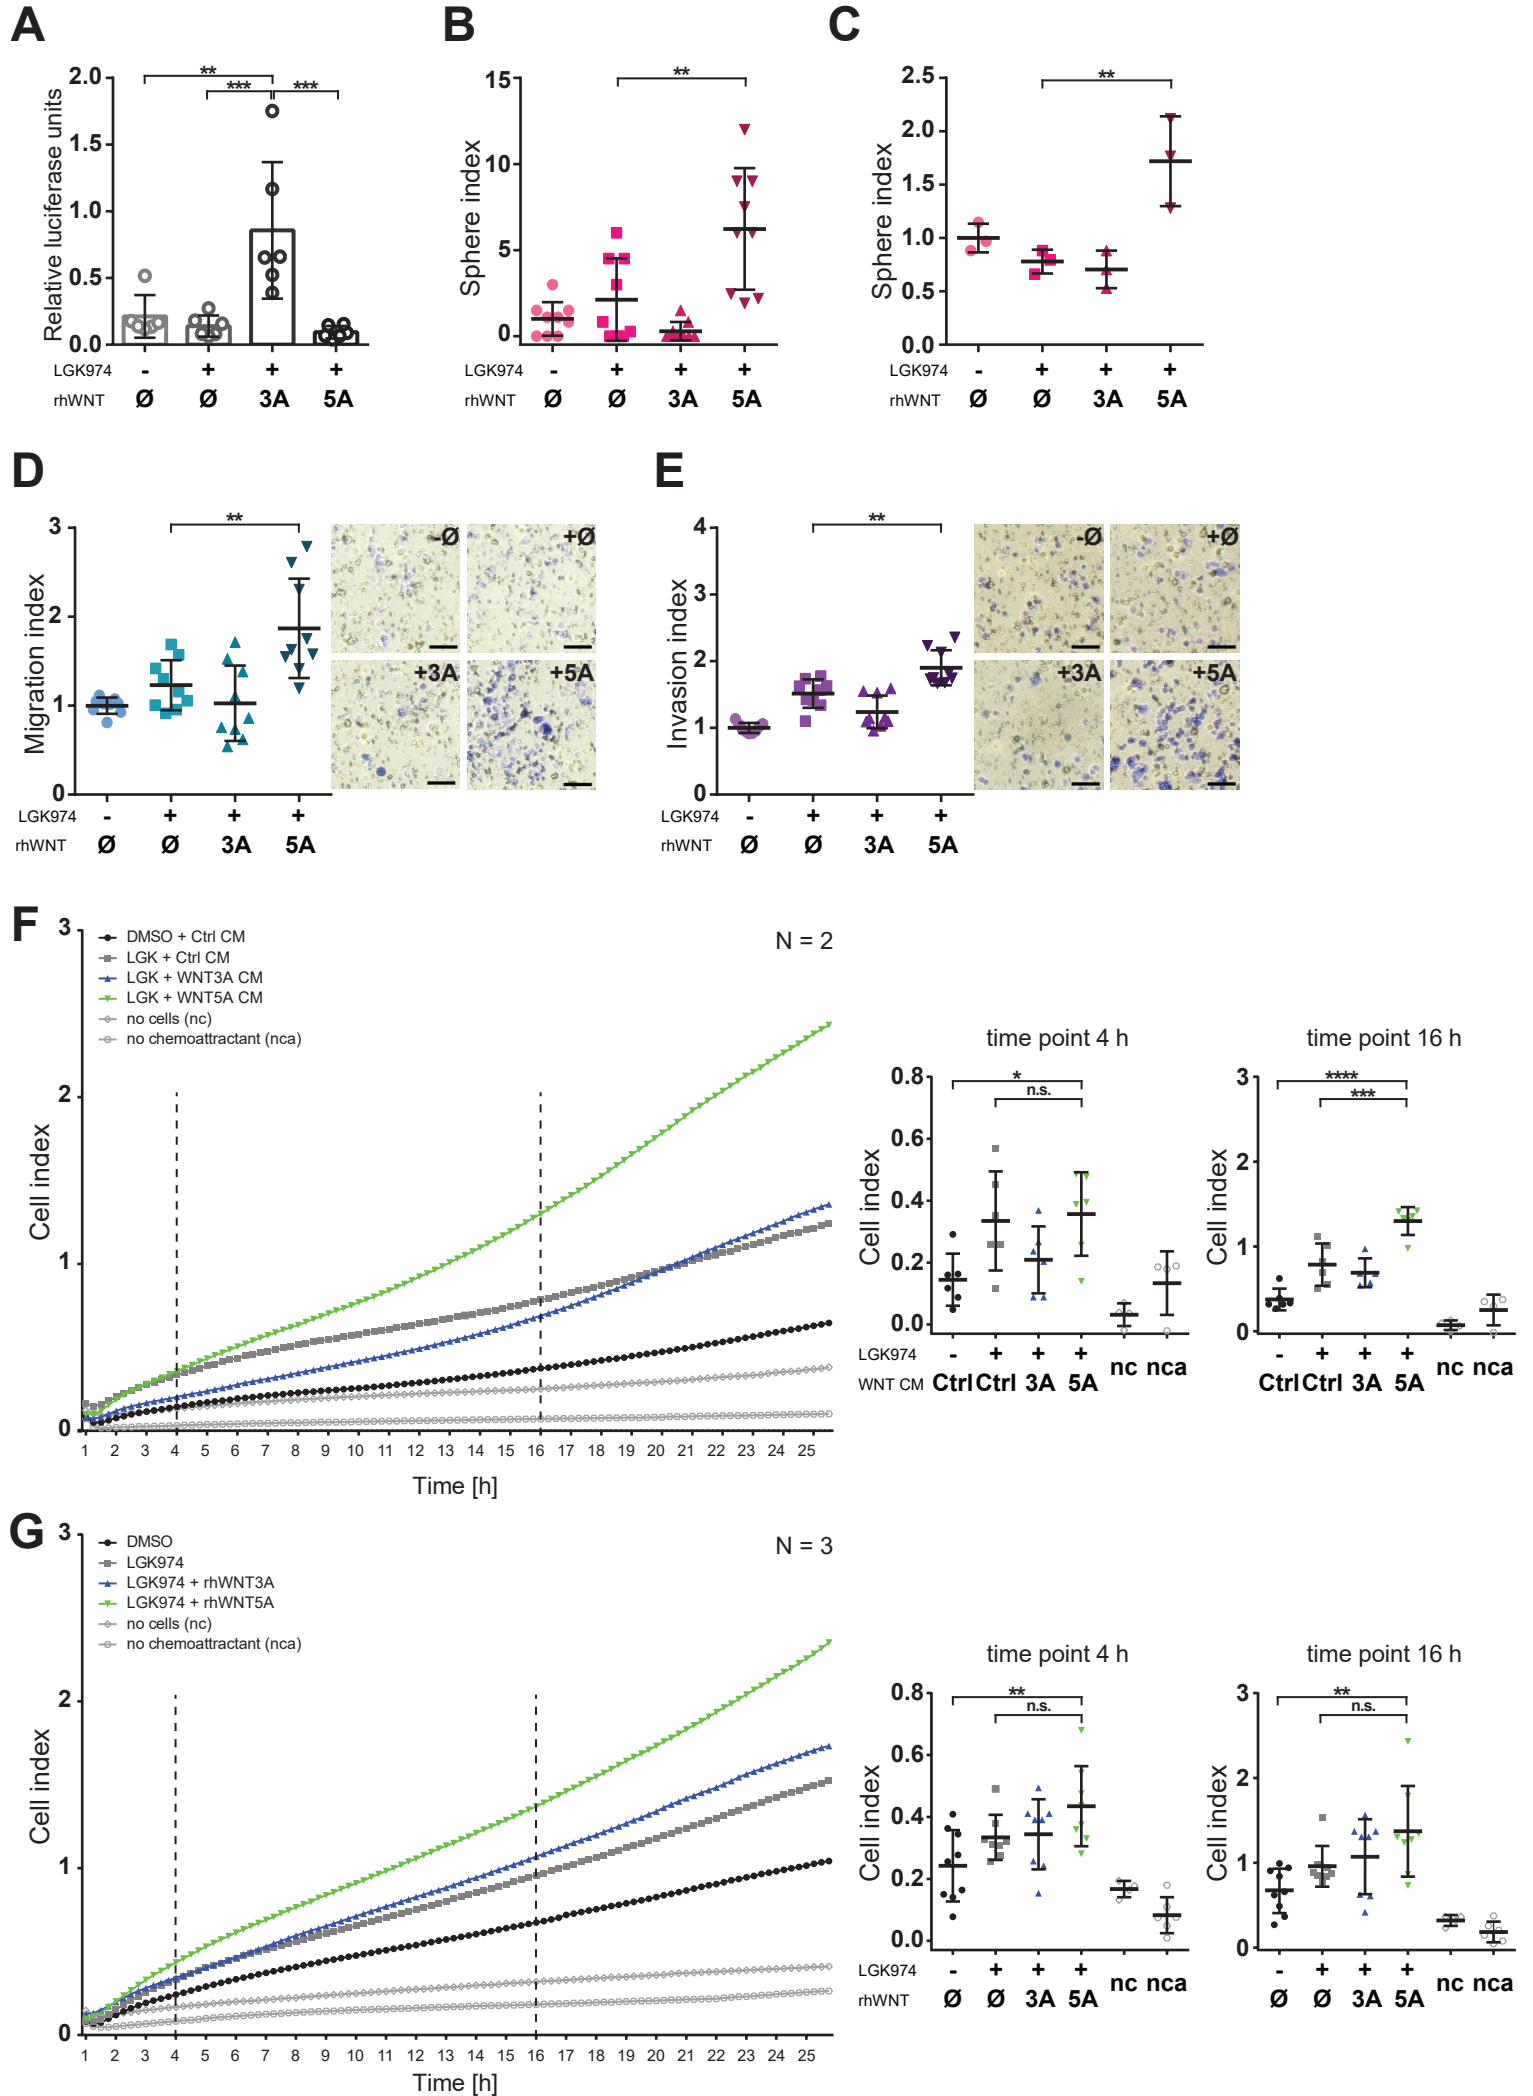

# Supplementary Figure S4

**A**

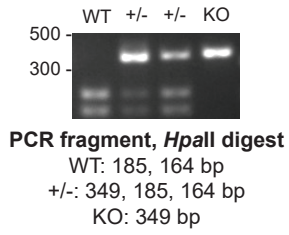

**B**

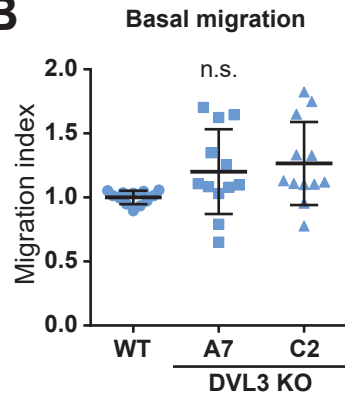

**C**

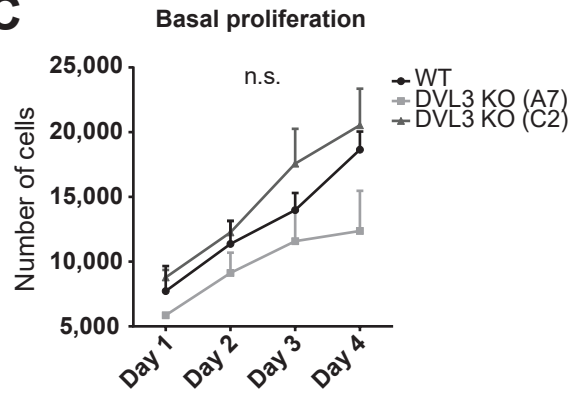

**D**

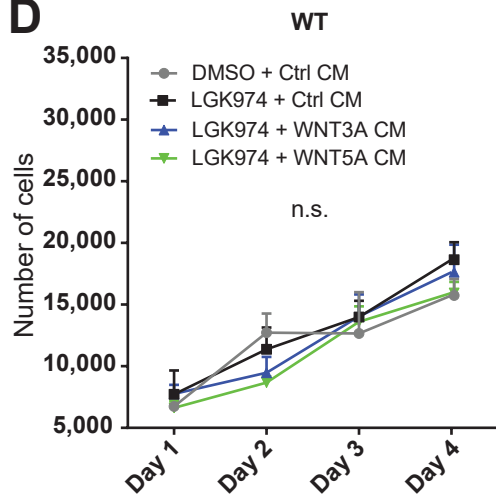

**D'**

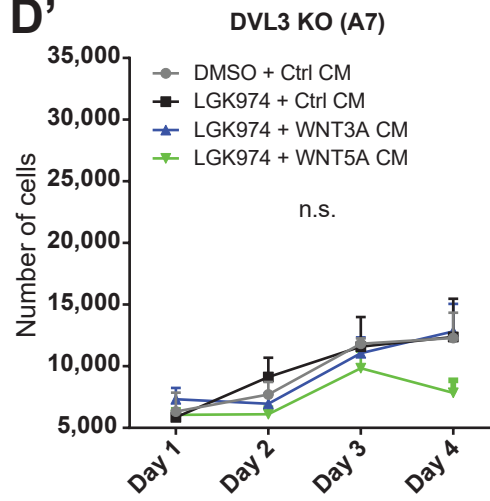

**D''**

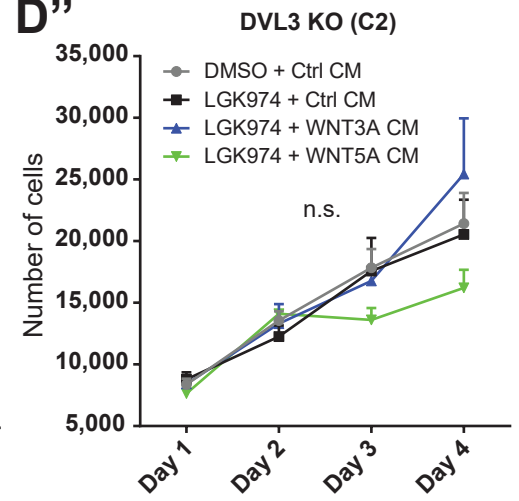



# Supplementary figure S5

## A

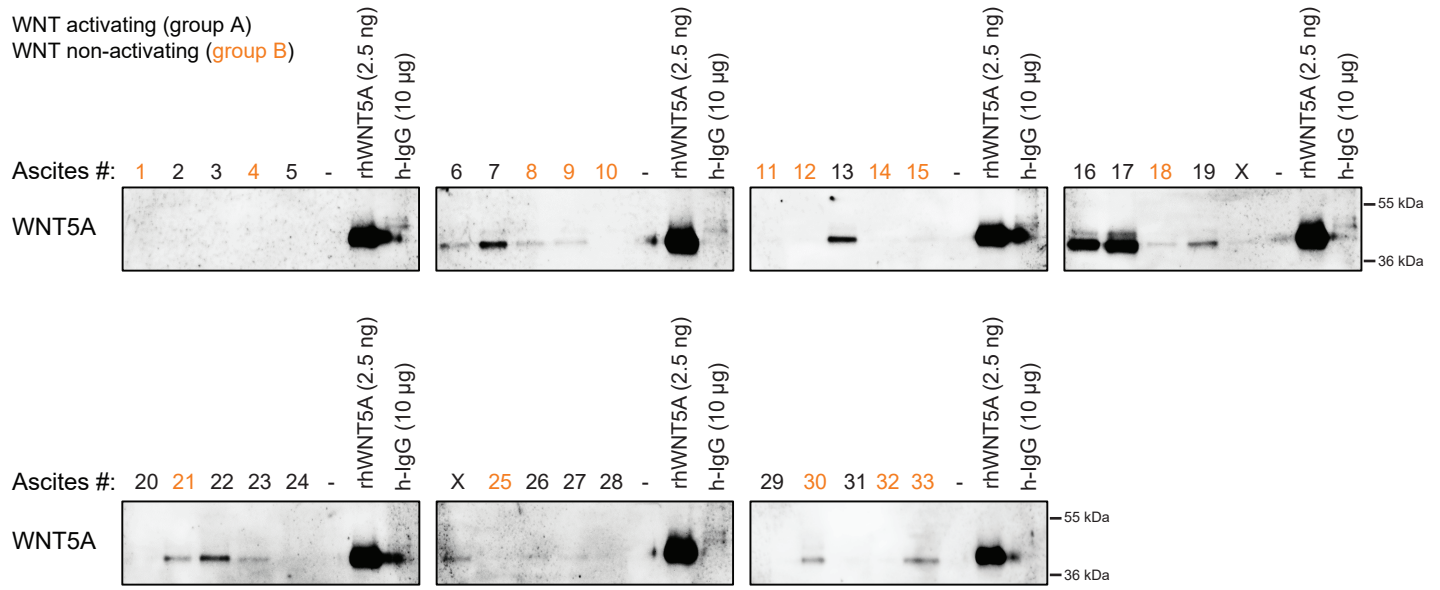

## B

WNT5A levels ascites

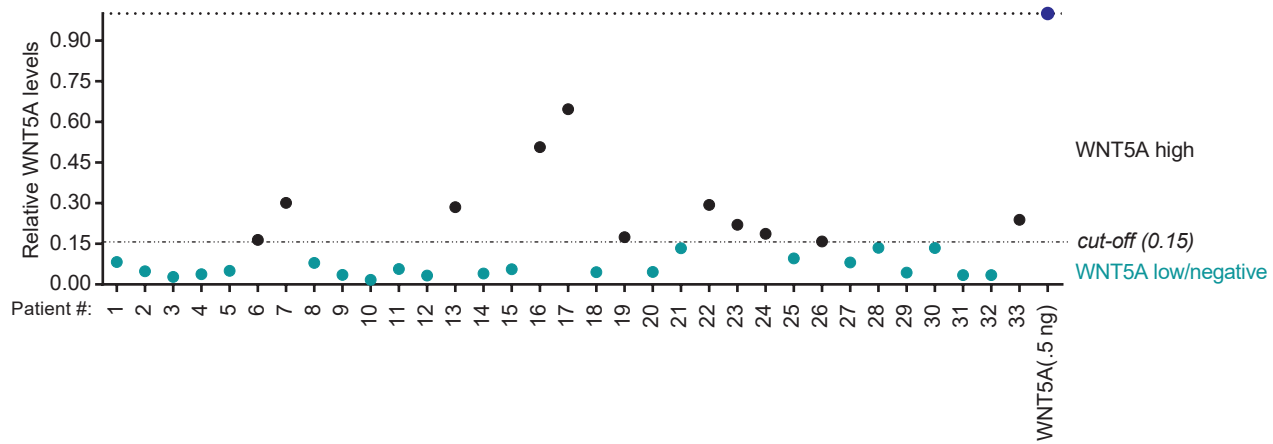

# Supplementary Figure S6

## A - OC vs. other cancers

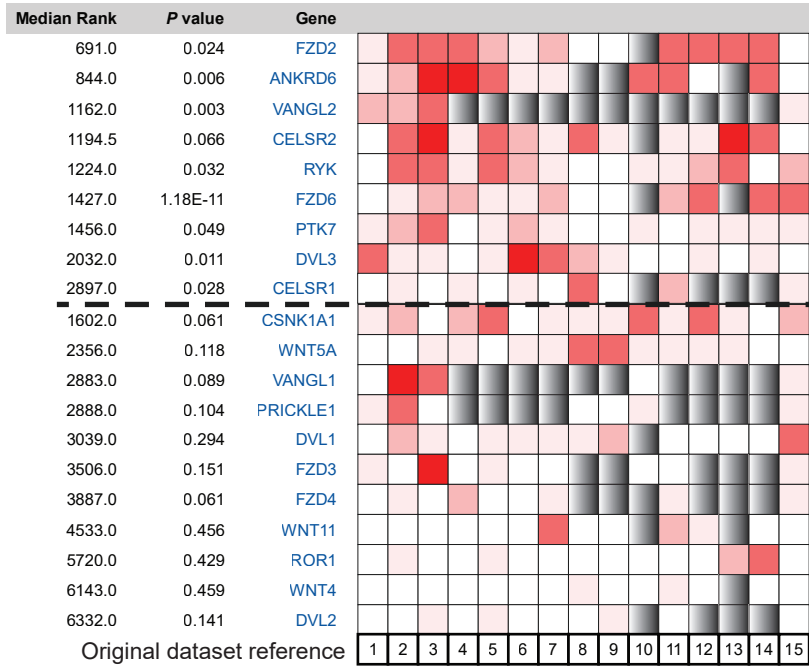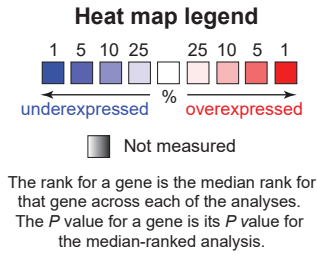

## C - metastasis vs. primary site HGSC

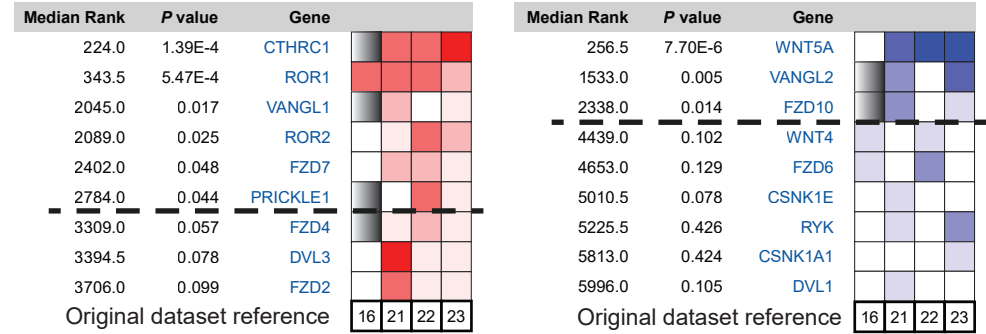

## B - HGSC vs. healthy ovary

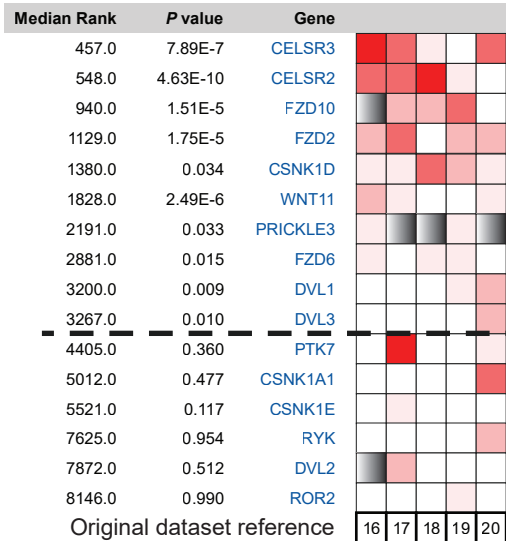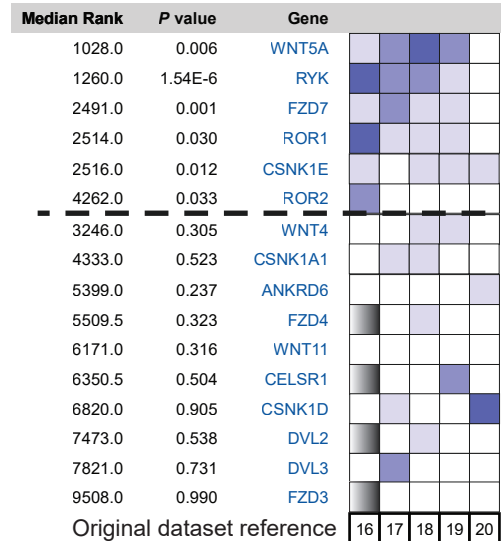

## D

| Number | Citation                                               |
|--------|--------------------------------------------------------|
| 1      | Adai CellLine, Not Published, 2008                     |
| 2      | Barretina CellLine, Nature, 2012                       |
| 3      | Bittner Multi-cancer, Not Published, 2006              |
| 4      | Compendia CellLine, Not Published, 2007                |
| 5      | Garnett CellLine, Nature, 2012                         |
| 6      | Gyorffy CellLine, Int J Cancer, 2006                   |
| 7      | Lee CellLine, Proc Natl Acad Sci U S A, 2007           |
| 8      | Ramaswamy Multi-cancer, Proc Natl Acad Sci U S A, 2001 |
| 9      | Ramaswamy Multi-cancer 2, Nat Genet, 2003              |
| 10     | Scherf CellLine, Nat Genet, 2000                       |
| 11     | Shankavaram CellLine, Mol Cancer Ther, 2007            |
| 12     | Shankavaram CellLine 2, Mol Cancer Ther, 2007          |
| 13     | Staunton CellLine, Proc Natl Acad Sci U S A, 2001      |
| 14     | Su Multi-cancer, Cancer Res, 2001                      |
| 15     | Wooster CellLine, Not Published, 2008                  |
| 16     | Adib Ovarian, Br J Cancer, 2004                        |
| 17     | Bonome Ovarian, Cancer Res, 2008                       |
| 18     | Hendrix Ovarian, Cancer Res, 2006                      |
| 19     | Lu Ovarian, Clin Cancer Res, 2004                      |
| 20     | TCGA Ovarian, No associated Paper, 2013                |
| 21     | Anglesio Ovarian, Mol Cancer Res, 2008                 |
| 22     | Bittner Ovarian, Not Published, 2005                   |
| 23     | Tothill Ovarian, Clin Cancer Res, 2008                 |

# Supplementary Figure S7

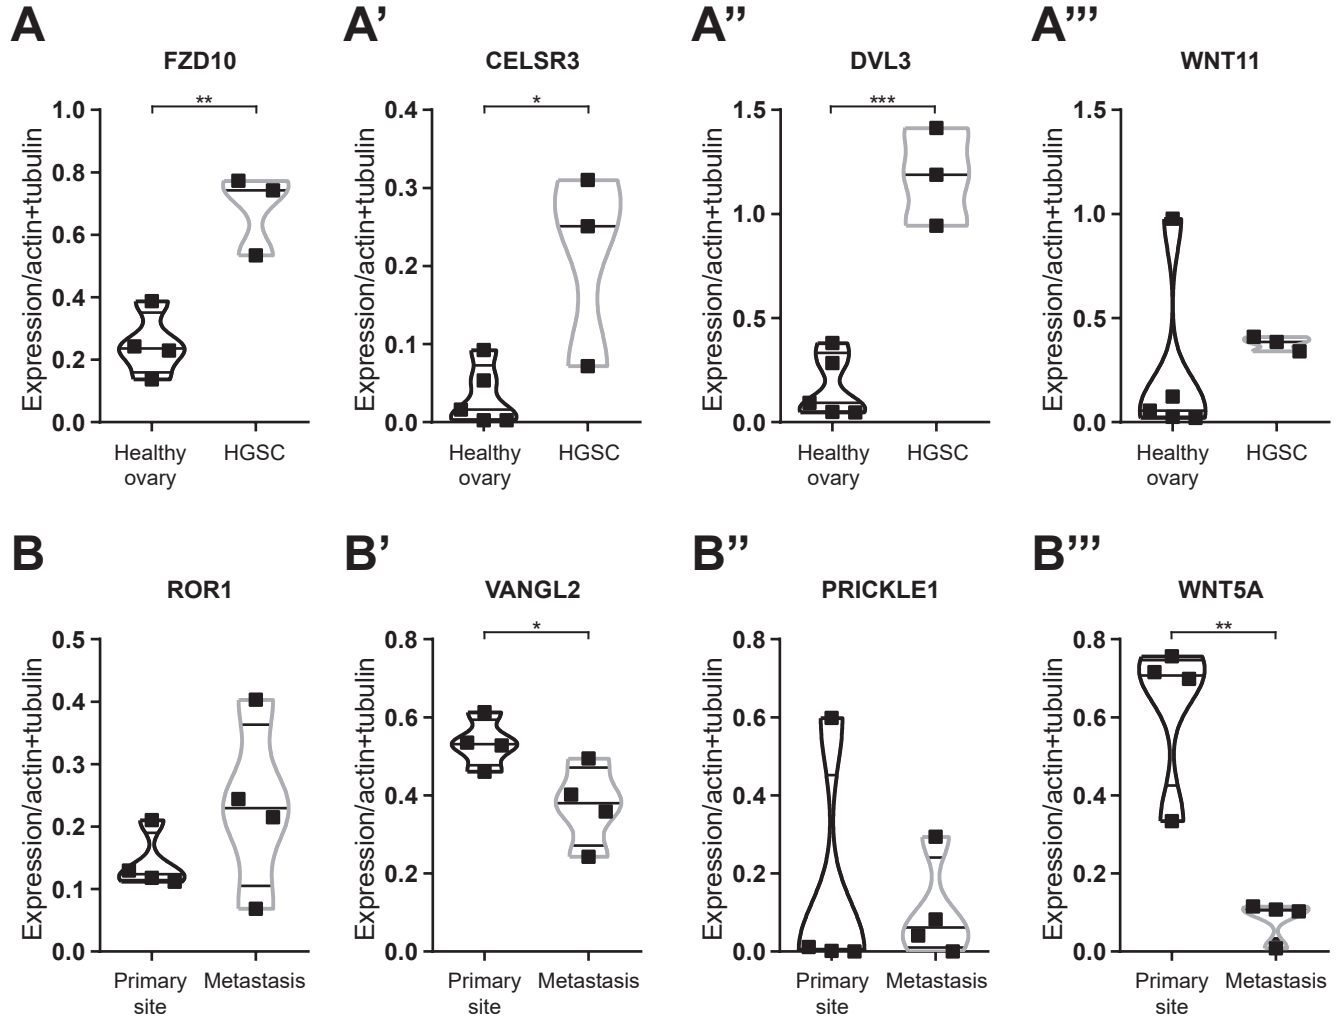

Supplementary Table ST1

| Group | Activates Wnt signaling | Patient # | Age | FIGO stage (surgical) | Grade | Histology | Residual disease | BRCA mutation | 1 <sup>st</sup> Chemotherapy |                         |                     | 1 <sup>st</sup> Recurrence |                       | 2 <sup>nd</sup> Chemotherapy |                         |                     | Death            |                   |
|-------|-------------------------|-----------|-----|-----------------------|-------|-----------|------------------|---------------|------------------------------|-------------------------|---------------------|----------------------------|-----------------------|------------------------------|-------------------------|---------------------|------------------|-------------------|
|       |                         |           |     |                       |       |           |                  |               | Regime <sup>1</sup>          | End (DAD <sup>2</sup> ) | Progression         | DAD <sup>2</sup>           | Location <sup>3</sup> | Regime <sup>1</sup>          | End (DAD <sup>2</sup> ) | Progression         | DAD <sup>2</sup> | Cause             |
| B     | no                      | 1         | 52  | IIIC                  | high  | serous    | R0               | gerBRCA2 mut  | P/C 3x (NACHT), P/C 3x       | 172                     | complete response   | 384                        | L, R, D               | G/C/B 6x                     | 516                     | progression         | 919              | ovarian carcinoma |
| A     | yes                     | 2         | 72  | IIIC                  | high  | serous    | >1 cm            | unknown       | P/C 6x                       | 131                     | complete response   | 397                        | R                     | G/C 5x                       | 502                     | complete response   | 692              | ovarian carcinoma |
| A     | yes                     | 3         | 83  | IVA                   | high  | serous    | >1 cm            | unknown       | C 6x                         | 141                     | stable disease      | 427                        | L                     | P 24x                        | 632                     | stable disease      | 1597             | ovarian carcinoma |
| B     | no                      | 4         | 48  | IIIC                  | high  | serous    | <1 cm            | unknown       | P/C 6x                       | 131                     | complete response   | 467                        | L,D                   | PLD 5x                       | 621                     | progressive disease | 819              | ovarian carcinoma |
| A     | yes                     | 5         | 51  | IVB                   | high  | serous    | inoperable       | unknown       | P/C 4x (NACHT)               | 90                      | stable disease      | -                          | -                     | -                            | -                       | -                   | 153              | ovarian carcinoma |
| A     | yes                     | 6         | 57  | IIIC                  | high  | serous    | R0               | somBRCAwt     | P/C 6x                       | 133                     | complete response   | 475                        | D                     | G/C 6x, C 3x                 | 764                     | Partial response    | 1082             | ovarian carcinoma |
| A     | yes                     | 7         | 58  | IIIC                  | high  | serous    | R0               | som BRCA1mut  | P/C 5x                       | 114                     | complete response   | 750                        | L, R, D               | G/C 7x                       | 953                     | Partial response    | -                | alive             |
| B     | no                      | 8*        | 44  | IVA                   | high  | serous    | >1 cm            | ger BRCAwt    | G/C 6x, B                    | 162                     | stable disease      | 1056                       | L, R                  | C 3x, cDDP 9x                | 1261                    | progression         | -                | alive             |
| B     | no                      | 9         | 51  | IIIB                  | high  | serous    | R0               | unknown       | P/C                          | 195                     | complete response   | 546                        | R, D                  | C                            | 736                     | unknown             | 782              | ovarian carcinoma |
| B     | no                      | 10        | 57  | IIIC                  | high  | serous    | R0               | unknown       | P/C 6x                       | 172                     | complete response   | 389                        | D                     | -                            | -                       | -                   | 1577             | unknown           |
| B     | no                      | 11        | 43  | IIIA1                 | high  | serous    | <1 cm            | unknown       | P/C 4x (NACHT), P/C 2x       | 140                     | partial response    | -                          | -                     | -                            | -                       | -                   | 638              | ovarian carcinoma |
| B     | no                      | 12*       | 64  | IIIC                  | high  | serous    | R0               | gerBRCA1mut   | C 2x, D 4x                   | 166                     | complete response   | 781                        | D                     | cDDP                         | 1154                    | stable disease      | -                | alive             |
| A     | yes                     | 13        | 66  | IIIB                  | high  | serous    | R0               | unknown       | P/C 6x                       | 133                     | complete response   | 420                        | R, D                  | -                            | -                       | -                   | 460              | ovarian carcinoma |
| B     | no                      | 14        | 58  | IIIC                  | high  | serous    | R0               | unknown       | P/C                          | 141                     | complete response   | 321                        | R, D                  | T                            | 346                     | -                   | 493              | unknown           |
| B     | no                      | 15        | 47  | IIIC                  | high  | serous    | R0               | unknown       | P/C 6x                       | 147                     | complete response   | 1230                       | D                     | -                            | -                       | -                   | -                | alive             |
| A     | yes                     | 16        | 70  | IIIC                  | high  | serous    | >1 cm            | gerBRCAwt     | P/C/B 6x                     | 154                     | progressive disease | 395                        | L                     | PLD 3x                       | 455                     | progressive disease | 687              | unknown           |
| A     | yes                     | 17        | 82  | IIIC                  | high  | serous    | R0               | unknown       | C 9x                         | 157                     | complete response   | 213                        | L, R, D               | -                            | -                       | -                   | 232              | ovarian carcinoma |
| B     | no                      | 18        | 66  | IIIC                  | high  | serous    | R0               | unknown       | Rejected by patient          | -                       | -                   | 204                        | L, R, D               | P/C 6x                       | 391                     | partial response    | 644              | ovarian carcinoma |
| A     | yes                     | 19        | 67  | IIIC                  | high  | serous    | R0               | unknown       | P/C 6x                       | 154                     | complete response   | 340                        | R, D                  | -                            | -                       | -                   | 403              | ovarian carcinoma |
| A     | yes                     | 20        | 59  | IIIC                  | high  | serous    | >1 cm            | unknown       | P/C 6x (NACHT)               | 161                     | stable disease      | 317                        | L, R                  | -                            | -                       | -                   | 595              | ovarian carcinoma |
| B     | no                      | 21        | 69  | IIIA1                 | high  | serous    | R0               | unknown       | P/C 6x                       | 153                     | complete response   | -                          | -                     | -                            | -                       | -                   | -                | alive             |
| A     | yes                     | 22        | 63  | IIIC                  | high  | serous    | >1 cm            | gerBRCAwt     | P/C/B 2x                     | 165                     | partial response    | 319                        | R, D                  | D 3x                         | 407                     | Progression         | 662              | ovarian carcinoma |
| A     | yes                     | 23        | 59  | IIIC                  | high  | serous    | R0               | unknown       | P/C 6x                       | 138                     | progressive disease | 153                        | D                     | P 3x, PLD 1x                 | 211                     | Progression         | 258              | ovarian carcinoma |
| A     | yes                     | 24        | 83  | IIIC                  | high  | serous    | inoperable       | unknown       | C 6x                         | 210                     | progressive disease | 186                        | L, R, D               | -                            | -                       | -                   | 349              | ovarian carcinoma |
| B     | no                      | 25        | 71  | IVB                   | high  | serous    | inoperable       | unknown       | P/C 3x, D 4x                 | 229                     | progression         | 239                        | D                     | -                            | -                       | -                   | 325              | ovarian carcinoma |
| A     | yes                     | 26        | 76  | IIIC                  | high  | serous    | inoperable       | unknown       | P/C 10x                      | 104                     | progression         | 120                        | D                     | G                            | 295                     | progression         | 348              | ovarian carcinoma |
| A     | yes                     | 27        | 68  | IIIC                  | high  | serous    | R0               | gerBRCAwt     | P/C 6x                       | 156                     | progression         | 182                        | R, D                  | P/B 3x                       | 275                     | progression         | 300              | ovarian carcinoma |
| A     | yes                     | 28        | 63  | IIIC                  | high  | serous    | <1 cm            | gerBRCAwt     | P/C/B 6x                     | 175                     | partial response    | 528                        | D                     | G/C                          | in cursu                | -                   | -                | alive             |
| A     | yes                     | 29        | 70  | IIIC                  | high  | serous    | inoperable       | gerBRCA2mut   | P/C 8x                       | 223                     | complete response   | 463                        | R, D                  | C                            | 506                     | progression         | -                | alive             |
| B     | no                      | 30        | 36  | IIIC                  | high  | serous    | R0               | unknown       | P/C 6x                       | 146                     | complete response   | -                          | -                     | -                            | -                       | -                   | -                | alive             |
| A     | yes                     | 31        | 72  | IIIC                  | high  | serous    | inoperable       | gerBRCA2 mut  | P/C/B 6x                     | 121                     | partial response    | -                          | -                     | -                            | -                       | -                   | -                | alive             |
| B     | no                      | 32        | 71  | IIIC                  | high  | serous    | >1 cm            | unknown       | P/C/B 6x                     | 152                     | stable disease      | 376                        | D                     | PLD                          | in cursu                | -                   | -                | alive             |
| B     | no                      | 33        | 42  | IIIC                  | high  | serous    | R0               | unknown       | P/C 6x                       | 153                     | complete response   | -                          | -                     | -                            | -                       | -                   | -                | alive             |

\*ascites was collected during 1<sup>st</sup> recurrence, which was considered as a start of the study. Therefore the data about chemotherapy and recurrence in this table are for 2<sup>nd</sup> and 3<sup>rd</sup> chemotherapy and 2<sup>nd</sup> recurrence.

<sup>1</sup> P = Paclitaxel, C = CBDCA (Carboplatin), B = Bevacizumab, G = GEM (Gemcitabine), D = Doxorubicin, PLD = Pegylated liposomal doxorubicin, cDDP (Cisplatin), T = Topotecan (Hycamtin)

<sup>2</sup> DAD = days after diagnosis

<sup>3</sup> L = local, R = regional, D = distal

**Supplementary Table ST2**

| <b>PCP component</b>   | <b>Gene symbol</b> | <b>Gene ID</b> | <b>Number of mutated samples</b> | <b>Number of confirmed somatic non-silent</b> | <b>Total number of samples</b> | <b>% of confirmed mutated samples</b> |
|------------------------|--------------------|----------------|----------------------------------|-----------------------------------------------|--------------------------------|---------------------------------------|
| ligands                | WNT4               | 54361          | 2                                | 2                                             | 673                            | 0.30%                                 |
|                        | WNT5A              | 7474           | 1                                | 0                                             | 673                            | 0.00%                                 |
|                        | WNT11              | 7481           | 12*                              | 3                                             | 673                            | 0.45%                                 |
|                        | CTHRC1             | 115908         | 1                                | 1                                             | 673                            | 0.15%                                 |
| receptors              | FZD2               | 2535           | 3                                | 0                                             | 673                            | 0.00%                                 |
|                        | FZD3               | 7976           | 1                                | 1                                             | 673                            | 0.15%                                 |
|                        | FZD4               | 8322           | 2                                | 1                                             | 673                            | 0.15%                                 |
|                        | FZD6               | 8323           | 0                                | 0                                             | 673                            | 0.00%                                 |
|                        | FZD7               | 8324           | 3                                | 2                                             | 673                            | 0.30%                                 |
|                        | FZD10              | 11211          | 0                                | 0                                             | 673                            | 0.00%                                 |
|                        | PTK7               | 5754           | 10*                              | 1                                             | 693                            | 0.14%                                 |
|                        | ROR1               | 4919           | 6                                | 5                                             | 693                            | 0.72%                                 |
|                        | ROR2               | 4920           | 3                                | 3                                             | 693                            | 0.43%                                 |
|                        | RYK                | 6259           | 3                                | 3                                             | 693                            | 0.43%                                 |
| membrane proteins      | CELSR1             | 9620           | 2                                | 1                                             | 673                            | 0.15%                                 |
|                        | CELSR2             | 1952           | 8                                | 4                                             | 673                            | 0.59%                                 |
|                        | CELSR3             | 107934         | 14**                             | 5                                             | 673                            | 0.74%                                 |
|                        | VANGL1             | 81839          | 0                                | 0                                             | 673                            | 0.00%                                 |
|                        | VANGL2             | 57216          | 1                                | 1                                             | 673                            | 0.15%                                 |
| cytoplasmic components | ANKRD6             | 22881          | 2                                | 2                                             | 673                            | 0.30%                                 |
|                        | CSNK1A1            | 1452           | 0                                | 0                                             | 693                            | 0.00%                                 |
|                        | CSNK1D             | 1453           | 1                                | 0                                             | 693                            | 0.00%                                 |
|                        | CSNK1E             | 1454           | 3                                | 1                                             | 693                            | 0.14%                                 |
|                        | DVL1               | 1855           | 1                                | 0                                             | 673                            | 0.00%                                 |
|                        | DVL2               | 1856           | 0                                | 0                                             | 673                            | 0.00%                                 |
|                        | DVL3               | 1857           | 0                                | 0                                             | 673                            | 0.00%                                 |
|                        | PRICKLE1           | 144165         | 4                                | 3                                             | 673                            | 0.45%                                 |
|                        | PRICKLE2           | 166336         | 6                                | 2                                             | 673                            | 0.30%                                 |
|                        | PRICKLE3           | 4007           | 0                                | 0                                             | 673                            | 0.00%                                 |
|                        | PRICKLE4           | 29964          | 1                                | 1                                             | 673                            | 0.15%                                 |

\* please see Suppl. Table legends for explanation

\*\* please see Suppl. Table legends for explanation

Supplementary Table ST3

|                        | Gene_probe     | cut-off   | N        |          | Events   |          | Univariate    |               |              | Multivariate |               |              |
|------------------------|----------------|-----------|----------|----------|----------|----------|---------------|---------------|--------------|--------------|---------------|--------------|
|                        |                |           | <cut-off | ≥cut-off | <cut-off | ≥cut-off | HR            | 95% CI        | p-value      | HR           | 95% CI        | p-value      |
| ligands                | WNT4_208606    | -0.951465 | 458      | 104      | 233      | 60       | 1.299         | 0.977 - 1.727 | 0.071        |              |               |              |
|                        | WNT5A_205990   | 2.445535  | 342      | 220      | 181      | 112      | 0.74          | 0.583 - 0.938 | <b>0.013</b> | 0.809        | 0.574 - 1.139 | 0.224        |
|                        | WNT5A_213425   | 1.087275  | 413      | 149      | 225      | 68       | 0.725         | 0.552 - 0.953 | <b>0.021</b> | 0.859        | 0.580 - 1.274 | 0.451        |
|                        | WNT11_206737   | -0.902045 | 368      | 194      | 181      | 112      | 1.183         | 0.935 - 1.498 | 0.161        |              |               |              |
| receptors              | FZD2_210220    | 0.808505  | 243      | 319      | 123      | 170      | 1.153         | 0.914 - 1.455 | 0.229        |              |               |              |
|                        | FZD3_219683    | 2.579455  | 470      | 92       | 250      | 43       | 0.625         | 0.452 - 0.865 | <b>0.004</b> | 0.644        | 0.459 - 0.905 | <b>0.011</b> |
|                        | FZD4_218665    | 1.255265  | 265      | 297      | 144      | 149      | 0.756         | 0.601 - 0.952 | <b>0.017</b> | 0.850        | 0.668 - 1.083 | 0.189        |
|                        | FZD6_203987    | 2.34851   | 264      | 298      | 126      | 167      | 1.106         | 0.877 - 1.395 | 0.395        |              |               |              |
|                        | FZD7_203705    | 1.368225  | 192      | 370      | 88       | 205      | 1.262         | 0.983 - 1.621 | 0.067        |              |               |              |
|                        | FZD7_203706    | 0.5534    | 110      | 452      | 47       | 246      | 1.500         | 1.097 - 2.051 | <b>0.011</b> | 1.501        | 1.084 - 2.08  | <b>0.015</b> |
|                        | FZD10_219764   | 2.104765  | 446      | 116      | 238      | 55       | 0.656         | 0.489 - 0.881 | <b>0.005</b> | 0.695        | 0.509 - 0.949 | <b>0.022</b> |
|                        | PTK7_207011    | 2.13049   | 293      | 269      | 139      | 154      | 1.116         | 0.887 - 1.404 | 0.348        |              |               |              |
|                        | ROR1_205805    | 0.258945  | 227      | 335      | 106      | 187      | 1.207         | 0.951 - 1.533 | 0.121        |              |               |              |
|                        | ROR1_211057    | -1.22015  | 113      | 449      | 61       | 232      | 0.642         | 0.482 - 0.855 | <b>0.002</b> | 0.664        | 0.491 - 0.899 | <b>0.008</b> |
|                        | ROR2_205578    | -1.54917  | 53       | 509      | 20       | 273      | 2.059         | 1.304 - 3.251 | <b>0.002</b> | 1.597        | 0.992 - 2.572 | <b>0.054</b> |
|                        | RYK_202853     | 2.96723   | 39       | 523      | 27       | 266      | 0.696         | 0.468 - 1.036 | 0.073        |              |               |              |
| RYK_214172             | 2.23187        | 215       | 347      | 116      | 177      | 0.851    | 0.673 - 1.076 | 0.178         |              |              |               |              |
| RYK_216976             | 2.142425       | 534       | 28       | 272      | 21       | 1.929    | 1.234 - 3.017 | <b>0.003</b>  | 1.423        | 0.888 - 2.28 | 0.143         |              |
| membrane proteins      | CELSR1_204539  | -1.741015 | 29       | 533      | 17       | 276      | 0.551         | 0.337 - 0.902 | <b>0.016</b> | 0.502        | 0.299 - 0.84  | <b>0.009</b> |
|                        | CELSR1_217262  | -1.327035 | 247      | 315      | 132      | 161      | 0.848         | 0.673 - 1.07  | 0.164        |              |               |              |
|                        | CELSR2_204029  | 1.97363   | 106      | 456      | 53       | 240      | 0.722         | 0.535 - 0.975 | <b>0.033</b> | 0.954        | 0.688 - 1.324 | 0.778        |
|                        | CELSR2_36499   | 1.59268   | 96       | 466      | 48       | 245      | 0.781         | 0.572 - 1.067 | 0.120        |              |               |              |
|                        | CELSR3_205165  | -0.79389  | 229      | 333      | 103      | 190      | 1.330         | 1.046 - 1.691 | <b>0.019</b> | 1.334        | 1.037 - 1.716 | <b>0.025</b> |
| CELSR3_40020           | -0.85786       | 63        | 499      | 26       | 267      | 1.417    | 0.947 - 2.122 | 0.088         |              |              |               |              |
| cytoplasmic components | ANKRD6_204671  | 2.421605  | 280      | 282      | 148      | 145      | 0.867         | 0.689 - 1.091 | 0.224        |              |               |              |
|                        | ANKRD6_204672  | 2.183555  | 500      | 62       | 271      | 22       | 0.629         | 0.407 - 0.972 | <b>0.035</b> | 0.805        | 0.514 - 1.261 | 0.344        |
|                        | CSNK1A1_206562 | 4.552265  | 373      | 189      | 178      | 115      | 1.266         | 1 - 1.602     | <b>0.050</b> | 1.261        | 0.985 - 1.614 | 0.066        |
|                        | CSNK1A1_208865 | 4.918165  | 409      | 153      | 206      | 87       | 1.247         | 0.968 - 1.606 | 0.087        |              |               |              |
|                        | CSNK1A1_213086 | 4.643735  | 476      | 86       | 241      | 52       | 1.258         | 0.931 - 1.7   | 0.135        |              |               |              |
|                        | CSNK1A1_213860 | 5.01709   | 314      | 248      | 154      | 139      | 1.204         | 0.957 - 1.516 | 0.114        |              |               |              |
|                        | CSNK1D_207945  | 2.946665  | 342      | 220      | 188      | 105      | 0.695         | 0.546 - 0.885 | <b>0.003</b> | 0.739        | 0.571 - 0.957 | <b>0.022</b> |
|                        | CSNK1D_208774  | 2.890305  | 96       | 466      | 53       | 240      | 0.693         | 0.514 - 0.934 | <b>0.015</b> | 0.749        | 0.544 - 1.030 | 0.076        |
|                        | CSNK1E_202332  | 2.02839   | 330      | 232      | 155      | 138      | 1.208         | 0.959 - 1.521 | 0.108        |              |               |              |
|                        | CSNK1E_222015  | -0.15933  | 219      | 343      | 127      | 166      | 0.786         | 0.623 - 0.991 | <b>0.042</b> | 0.875        | 0.681 - 1.124 | 0.296        |
|                        | DVL1_203230    | 2.0567    | 510      | 52       | 274      | 19       | 0.544         | 0.341 - 0.868 | <b>0.009</b> | 0.602        | 0.371 - 0.976 | <b>0.040</b> |
|                        | DVL2_218759    | -0.842445 | 187      | 375      | 105      | 188      | 0.845         | 0.665 - 1.073 | 0.166        |              |               |              |
|                        | DVL2_57532     | 1.641215  | 419      | 143      | 224      | 69       | 0.788         | 0.601 - 1.034 | 0.085        |              |               |              |
|                        | DVL3_201907    | -0.662335 | 107      | 455      | 65       | 228      | 0.628         | 0.476 - 0.83  | <b>0.001</b> | 0.613        | 0.459 - 0.819 | <b>0.001</b> |
|                        | DVL3_201908    | 2.989755  | 199      | 363      | 115      | 178      | 0.833         | 0.659 - 1.054 | 0.128        |              |               |              |

Supplementary Table ST4

| Dataset reference | Name of dataset          | Gene Expression Omnibus | Link to dataset information                                                                                                                                                                                                       | Original published dataset                                                                                                                                                                                                                                     | Note                                                                                                                                                                                                                                                                                                                                                                                                                                                                                                                                                                                                                                               |
|-------------------|--------------------------|-------------------------|-----------------------------------------------------------------------------------------------------------------------------------------------------------------------------------------------------------------------------------|----------------------------------------------------------------------------------------------------------------------------------------------------------------------------------------------------------------------------------------------------------------|----------------------------------------------------------------------------------------------------------------------------------------------------------------------------------------------------------------------------------------------------------------------------------------------------------------------------------------------------------------------------------------------------------------------------------------------------------------------------------------------------------------------------------------------------------------------------------------------------------------------------------------------------|
| 1                 | Adai CellLine            | GSE10843                | <a href="https://www.ncbi.nlm.nih.gov/geo/query/acc.cgi?acc=GSE10843">https://www.ncbi.nlm.nih.gov/geo/query/acc.cgi?acc=GSE10843</a> .                                                                                           | Stinson S, Lackner MR, Adai AT, Yu N, Kim HJ, O'Brien C, et al. TRPS1 targeting by miR-221/222 promotes the epithelial-to-mesenchymal transition in breast cancer. <i>Science signaling</i> . 2011; 4: ra41.                                                   | Compendia CellLine is a hybrid study that utilizes gene expression data on the NCI-60 cell lines as reported by Shankavaram et al., combined with sample data curated by Compendia Bioscience. This effort began in 2007 with the addition of drug sensitivity data reported by the National Cancer Institute, followed by differential expression analysis of sensitive and resistant classes for each drug. In 2008 this study was further developed by the addition of the mutation status of 27 genes across the cell line panel, as reported by the Sanger Institute. Replicates for cell lines MCF7 and IGROV1 are not included in analyses. |
| 2                 | Barretina CellLine       | GSE36139                | <a href="https://www.ncbi.nlm.nih.gov/geo/query/acc.cgi?acc=GSE36139">https://www.ncbi.nlm.nih.gov/geo/query/acc.cgi?acc=GSE36139</a> .                                                                                           | Barretina J, Caponigro G, Stransky N, Venkatesan K, Margolin AA, Kim S, et al. The Cancer Cell Line Encyclopedia enables predictive modelling of anticancer drug sensitivity. <i>Nature</i> . 2012; 483: 603-7.                                                |                                                                                                                                                                                                                                                                                                                                                                                                                                                                                                                                                                                                                                                    |
| 3                 | Bittner Multi-cancer     | GSE2109                 | <a href="https://www.ncbi.nlm.nih.gov/geo/query/acc.cgi?acc=GSE2109">https://www.ncbi.nlm.nih.gov/geo/query/acc.cgi?acc=GSE2109</a> .                                                                                             | -                                                                                                                                                                                                                                                              |                                                                                                                                                                                                                                                                                                                                                                                                                                                                                                                                                                                                                                                    |
| 4                 | Compendia CellLine       | -                       | -                                                                                                                                                                                                                                 | -                                                                                                                                                                                                                                                              |                                                                                                                                                                                                                                                                                                                                                                                                                                                                                                                                                                                                                                                    |
| 5                 | Garnett CellLine         | -                       | <a href="https://www.ebi.ac.uk/arrayexpress/experiments/E-MTAB-783/">https://www.ebi.ac.uk/arrayexpress/experiments/E-MTAB-783/</a>                                                                                               | Garnett MJ, Edelman EJ, Heidorn SJ, Greenman CD, Dastur A, Lau KW, et al. Systematic identification of genomic markers of drug sensitivity in cancer cells. <i>Nature</i> . 2012; 483: 570-5.                                                                  |                                                                                                                                                                                                                                                                                                                                                                                                                                                                                                                                                                                                                                                    |
| 6                 | Gyorffy CellLine         | GSE11812                | <a href="http://www.ncbi.nlm.nih.gov/geo/query/acc.cgi?acc=GSE5846">http://www.ncbi.nlm.nih.gov/geo/query/acc.cgi?acc=GSE5846</a> .                                                                                               | Gyorffy B, Surowiak P, Kiesslich O, Denkert C, Schafer R, Dietel M, et al. Gene expression profiling of 30 cancer cell lines predicts resistance towards 11 anticancer drugs at clinically achieved concentrations. <i>Int J Cancer</i> . 2006; 118: 1699-712. |                                                                                                                                                                                                                                                                                                                                                                                                                                                                                                                                                                                                                                                    |
| 7                 | Lee CellLine             | GSE5846                 | <a href="http://www.ncbi.nlm.nih.gov/geo/query/acc.cgi?acc=GSE5846">http://www.ncbi.nlm.nih.gov/geo/query/acc.cgi?acc=GSE5846</a> .                                                                                               | Lee JK, Havaleshko DM, Cho H, Weinstein JN, Kaldjian EP, Karpovich J, et al. A strategy for predicting the chemosensitivity of human cancers and its application to drug discovery. <i>Proc Natl Acad Sci U S A</i> . 2007; 104: 13086-91.                     |                                                                                                                                                                                                                                                                                                                                                                                                                                                                                                                                                                                                                                                    |
| 8                 | Ramaswamy Multi-cancer   | -                       | <a href="http://www-genome.wi.mit.edu/cgi-bin/cancer/publications/pub_paper.cgi?mode=view&amp;paper_id=61">http://www-genome.wi.mit.edu/cgi-bin/cancer/publications/pub_paper.cgi?mode=view&amp;paper_id=61</a> .                 | Ramaswamy S, Tamayo P, Rifkin R, Mukherjee S, Yeang CH, Angelo M, et al. Multiclass cancer diagnosis using tumor gene expression signatures. <i>Proc Natl Acad Sci U S A</i> . 2001; 98: 15149-54.                                                             |                                                                                                                                                                                                                                                                                                                                                                                                                                                                                                                                                                                                                                                    |
| 9                 | Ramaswamy Multi-cancer 2 | -                       | <a href="http://www-genome.wi.mit.edu/cgi-bin/cancer/publications/pub_paper.cgi?mode=view&amp;paper_id=80">http://www-genome.wi.mit.edu/cgi-bin/cancer/publications/pub_paper.cgi?mode=view&amp;paper_id=80</a> .                 | Ramaswamy S, Ross KN, Lander ES, Golub TR. A molecular signature of metastasis in primary solid tumors. <i>Nat Genet</i> . 2003; 33: 49-54.                                                                                                                    |                                                                                                                                                                                                                                                                                                                                                                                                                                                                                                                                                                                                                                                    |
| 10                | Scherf CellLine          | -                       | <a href="http://discover.nci.nih.gov/datasetsNature2000.jsp">http://discover.nci.nih.gov/datasetsNature2000.jsp</a> .                                                                                                             | Scherf U, Ross DT, Waltham M, Smith LH, Lee JK, Tanabe L, et al. A gene expression database for the molecular pharmacology of cancer. <i>Nat Genet</i> . 2000; 24: 236-44.                                                                                     |                                                                                                                                                                                                                                                                                                                                                                                                                                                                                                                                                                                                                                                    |
| 11                | Shankavaram CellLine     | GSE5720                 | <a href="http://www.ncbi.nlm.nih.gov/geo/query/acc.cgi?acc=GSE5720">http://www.ncbi.nlm.nih.gov/geo/query/acc.cgi?acc=GSE5720</a> .                                                                                               | Shankavaram UT, Reinhold WC, Nishizuka S, Major S, Morita D, Chary KK, et al. Transcript and protein expression profiles of the NCI-60 cancer cell panel: an integromic microarray study. <i>Molecular cancer therapeutics</i> . 2007; 6: 820-829.             |                                                                                                                                                                                                                                                                                                                                                                                                                                                                                                                                                                                                                                                    |
| 12                | Shankavaram CellLine 2   | GSE5949                 | <a href="http://www.ncbi.nlm.nih.gov/geo/query/acc.cgi?acc=GSE5949">http://www.ncbi.nlm.nih.gov/geo/query/acc.cgi?acc=GSE5949</a> .                                                                                               | Reinhold WC, Reimers MA, Lorenzi P, Ho J, Shankavaram UT, Ziegler MS, et al. Multifactorial regulation of E-cadherin expression: an integrative study. <i>Molecular cancer therapeutics</i> . 2010; 9: 1-16.                                                   |                                                                                                                                                                                                                                                                                                                                                                                                                                                                                                                                                                                                                                                    |
| 13                | Staunton CellLine        | -                       | <a href="http://www.broad.mit.edu/mpr/NCI60/NC160.html">http://www.broad.mit.edu/mpr/NCI60/NC160.html</a> .                                                                                                                       | Staunton JE, Slonim DK, Collier HA, Tamayo P, Angelo MJ, Park J, et al. Chemosensitivity prediction by transcriptional profiling. <i>Proc Natl Acad Sci U S A</i> . 2001; 98: 10787-92.                                                                        |                                                                                                                                                                                                                                                                                                                                                                                                                                                                                                                                                                                                                                                    |
| 14                | Su Multi-cancer          | -                       | <a href="http://www.gnf.org/cancer/epican">http://www.gnf.org/cancer/epican</a> .                                                                                                                                                 | Su AI, Welsh JB, Sapinoso LM, Kern SG, Dimitrov P, Lapp H, et al. Molecular classification of human carcinomas by use of gene expression signatures. <i>Cancer Res</i> . 2001; 61: 7388-93.                                                                    |                                                                                                                                                                                                                                                                                                                                                                                                                                                                                                                                                                                                                                                    |
| 15                | Wooster CellLine         | -                       | <a href="https://array.nci.nih.gov/caarray/project/details.action?project.experiment.publicIdentifier=woost-00041">https://array.nci.nih.gov/caarray/project/details.action?project.experiment.publicIdentifier=woost-00041</a> . | -                                                                                                                                                                                                                                                              |                                                                                                                                                                                                                                                                                                                                                                                                                                                                                                                                                                                                                                                    |
| 16                | Adib Ovarian             | -                       | -                                                                                                                                                                                                                                 | Adib TR, Henderson S, Perrett C, Hewitt D, Bourmpoulia D, Ledermann J, et al. Predicting biomarkers for ovarian cancer using gene-expression microarrays. <i>Br J Cancer</i> . 2004; 90: 686-92.                                                               |                                                                                                                                                                                                                                                                                                                                                                                                                                                                                                                                                                                                                                                    |

|    |                  |          |                                                                                                                                       |                                                                                                                                                                                                                                                                         |
|----|------------------|----------|---------------------------------------------------------------------------------------------------------------------------------------|-------------------------------------------------------------------------------------------------------------------------------------------------------------------------------------------------------------------------------------------------------------------------|
| 17 | Bonome Ovarian   | -        | -                                                                                                                                     | Bonome T, Levine DA, Shih J, Randonovich M, Pise-Masison CA, Bogomolny F, et al. A gene signature predicting for survival in suboptimally debulked patients with ovarian cancer. <i>Cancer Res.</i> 2008; 68: 5478-86.                                                  |
| 18 | Hendrix Ovarian  | GSE6008  | <a href="http://www.ncbi.nlm.nih.gov/geo/query/acc.cgi?acc=GSE6008">http://www.ncbi.nlm.nih.gov/geo/query/acc.cgi?acc=GSE6008</a> .   | Hendrix ND, Wu R, Kuick R, Schwartz DR, Fearon ER, Cho KR. Fibroblast growth factor 9 has oncogenic activity and is a downstream target of Wnt signaling in ovarian endometrioid adenocarcinomas. <i>Cancer Res.</i> 2006; 66: 1354-62.                                 |
| 19 | Lu Ovarian       | -        | -                                                                                                                                     | Lu KH, Patterson AP, Wang L, Marquez RT, Atkinson EN, Baggerly KA, et al. Selection of potential markers for epithelial ovarian cancer with gene expression arrays and recursive descent partition analysis. <i>Clin Cancer Res.</i> 2004; 10: 3291-300.                |
| 20 | TCGA Ovarian     | -        | <a href="http://tcga-data.nci.nih.gov/tcga/">http://tcga-data.nci.nih.gov/tcga/</a> .                                                 | -                                                                                                                                                                                                                                                                       |
| 21 | Anglesio Ovarian | GSE12172 | <a href="http://www.ncbi.nlm.nih.gov/geo/query/acc.cgi?acc=GSE12172">http://www.ncbi.nlm.nih.gov/geo/query/acc.cgi?acc=GSE12172</a> . | Anglesio MS, Arnold JM, George J, Tinker AV, Tothill R, Waddell N, et al. Mutation of ERBB2 provides a novel alternative mechanism for the ubiquitous activation of RAS-MAPK in ovarian serous low malignant potential tumors. <i>Mol Cancer Res.</i> 2008; 6: 1678-90. |
| 22 | Bittner Ovarian  | GSE2109  | <a href="http://www.ncbi.nlm.nih.gov/geo/query/acc.cgi?acc=GSE2109">http://www.ncbi.nlm.nih.gov/geo/query/acc.cgi?acc=GSE2109</a> .   | -                                                                                                                                                                                                                                                                       |
| 23 | Tothill Ovarian  | GSE9899  | <a href="http://www.ncbi.nlm.nih.gov/geo/query/acc.cgi?acc=GSE9899">http://www.ncbi.nlm.nih.gov/geo/query/acc.cgi?acc=GSE9899</a> .   | Tothill RW, Tinker AV, George J, Brown R, Fox SB, Lade S, et al. Novel molecular subtypes of serous and endometrioid ovarian cancer linked to clinical outcome. <i>Clin Cancer Res.</i> 2008; 14: 5198-208.                                                             |
